# Supplementary material for: Furobenzotropolones A, B and 3-Hydroxyepicoccone B with Antioxidative Activity from Mangrove Endophytic Fungus Epicoccum nigrum MLY-3
Source: MDPI journal article supplement (doi:10.3390/md19070395), 2021-07-14
Supplement: s1 [file s1]

## Supporting information

### **Furobenzotropolones A, B and 3-hydroxyepicoccone B with Antioxidative Activity from Mangrove Endophytic Fungus**

#### ***Epicoccum nigrum* MLY-3**

Ge Zou <sup>1</sup>, Qi Tan <sup>1</sup>, Yan Chen <sup>1,2</sup>, Wencong Yang <sup>1</sup>, Zhenming Zang <sup>1</sup>, Hongming Jiang <sup>1</sup>, Shenyu Chen <sup>1</sup>, Bo Wang <sup>1,\*</sup> and Zhigang She <sup>1,\*</sup>

1 School of Chemistry, Sun Yat-Sen University, Guangzhou 510006, China;

2 National R & D Center for Edible Fungus Processing Technology, Henan University, Kaifeng 475004, China;

\* Correspondence: ceswb@mail.sysu.edu.cn (B. W.) cesshzhg@mail.sysu.edu.cn (Z. S.).

## Supporting information

|                                                                                                    |    |
|----------------------------------------------------------------------------------------------------|----|
| <b>Fig.S1.</b> HRESIMS spectrum of compound <b>1</b>                                               | 3  |
| <b>Fig.S2.</b> $^1\text{H}$ NMR spectrum of compound <b>1</b> (400 MHz, $\text{DMSO-}d_6$ )        | 3  |
| <b>Fig.S3.</b> $^{13}\text{C}$ NMR spectrum of <b>1</b> (100 MHz, $\text{DMSO-}d_6$ )              | 4  |
| <b>Fig.S4.</b> DEPT 135 and $^{13}\text{C}$ NMR spectra of <b>1</b> (100 MHz, $\text{DMSO-}d_6$ )  | 4  |
| <b>Fig.S5.</b> HSQC spectrum of compound <b>1</b> ( $\text{DMSO-}d_6$ )                            | 5  |
| <b>Fig.S6.</b> HMBC spectrum of compound <b>1</b> ( $\text{DMSO-}d_6$ )                            | 5  |
| <b>Fig.S7.</b> HRESIMS spectrum of compound <b>2</b>                                               | 6  |
| <b>Fig.S8.</b> $^1\text{H}$ NMR spectrum of compound <b>2</b> (500 MHz, $\text{DMSO-}d_6$ )        | 6  |
| <b>Fig.S9.</b> $^{13}\text{C}$ NMR spectrum of <b>2</b> (125 MHz, $\text{DMSO-}d_6$ )              | 7  |
| <b>Fig.S10.</b> DEPT 135 and $^{13}\text{C}$ NMR spectra of <b>2</b> (125 MHz, $\text{DMSO-}d_6$ ) | 7  |
| <b>Fig.S11</b> HSQC spectrum of compound <b>2</b> ( $\text{DMSO-}d_6$ )                            | 8  |
| <b>Fig.S12.</b> HMBC spectrum of compound <b>2</b> ( $\text{DMSO-}d_6$ )                           | 8  |
| <b>Fig.S13.</b> HREIMS spectrum of compound <b>3</b>                                               | 9  |
| <b>Fig.S14.</b> $^1\text{H}$ NMR spectrum of compound <b>3</b> (400 MHz, $\text{MeOH-}d_4$ )       | 9  |
| <b>Fig.S15.</b> $^{13}\text{C}$ NMR spectrum of <b>3</b> (100 MHz, $\text{MeOH-}d_4$ )             | 10 |
| <b>Fig.S16.</b> HSQC spectrum of compound <b>3</b> ( $\text{MeOH-}d_4$ )                           | 10 |
| <b>Fig.S17.</b> HMBC spectrum of compound <b>3</b> ( $\text{MeOH-}d_4$ )                           | 11 |

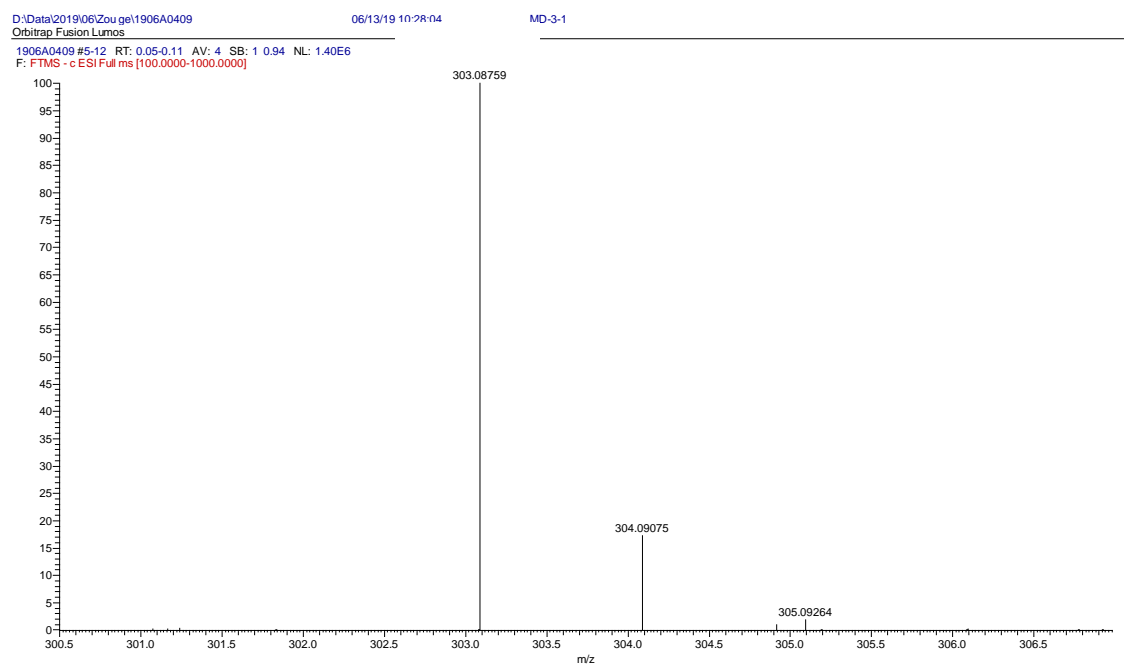

SPECTRUM - simulation :

| <i>m/z</i> | Theo. Mass | Delta (ppm) | RDB equiv. | Composition                                    |
|------------|------------|-------------|------------|------------------------------------------------|
| 303.08759  | 303.08741  | 0.59        | 9.5        | C <sub>16</sub> H <sub>15</sub> O <sub>6</sub> |

**Fig.S1.** HRESIMS spectrum of compound **1**

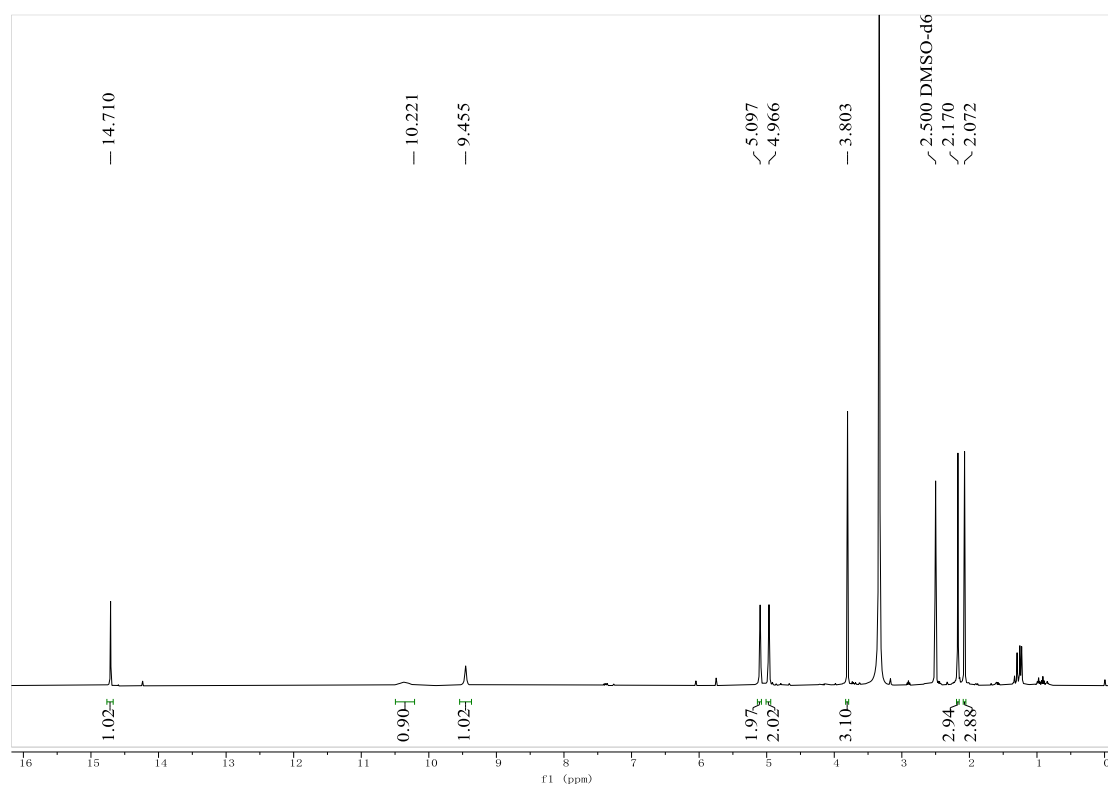

**Fig.S2.** <sup>1</sup>H NMR spectrum of compound **1** (400 MHz, DMSO-*d*<sub>6</sub>)

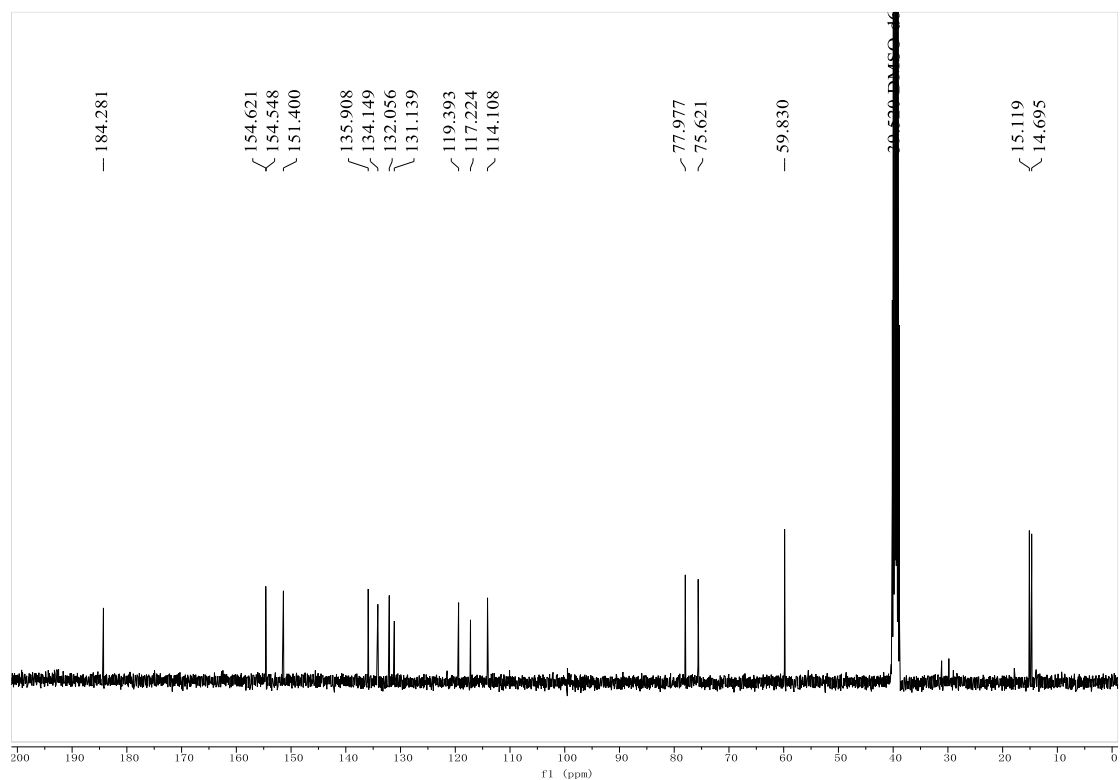

**Fig.S3.** <sup>13</sup>C NMR spectrum of compound **1** (100 MHz, DMSO-*d*<sub>6</sub>)

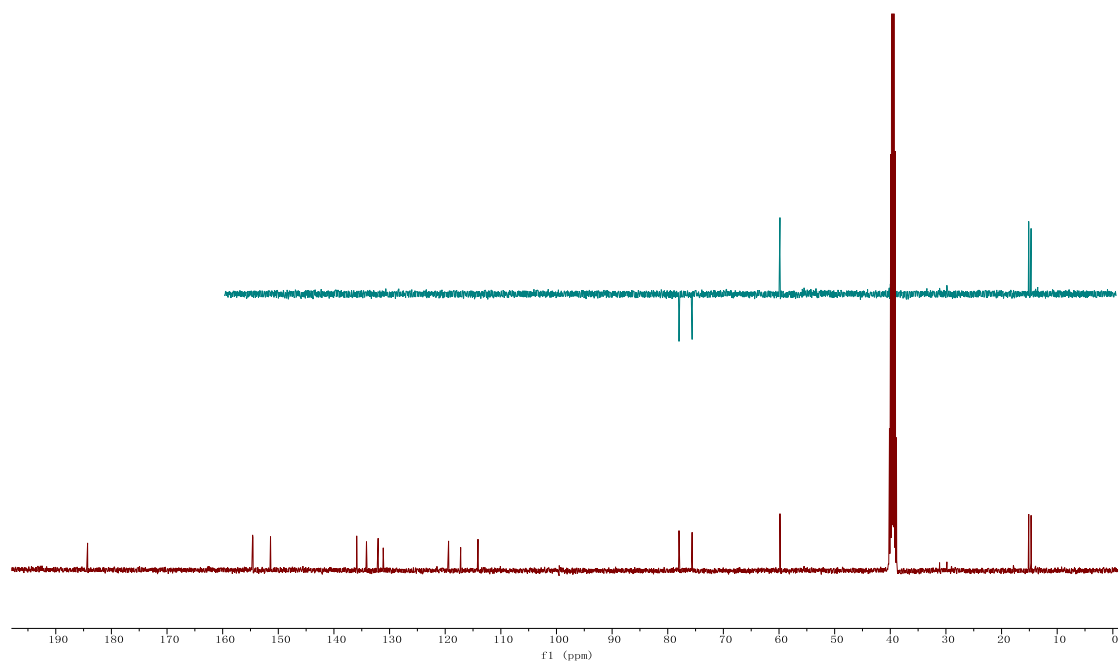

**Fig.S4.** DEPT 135 and <sup>13</sup>C NMR spectra of compound **1** (100 MHz, DMSO-*d*<sub>6</sub>)

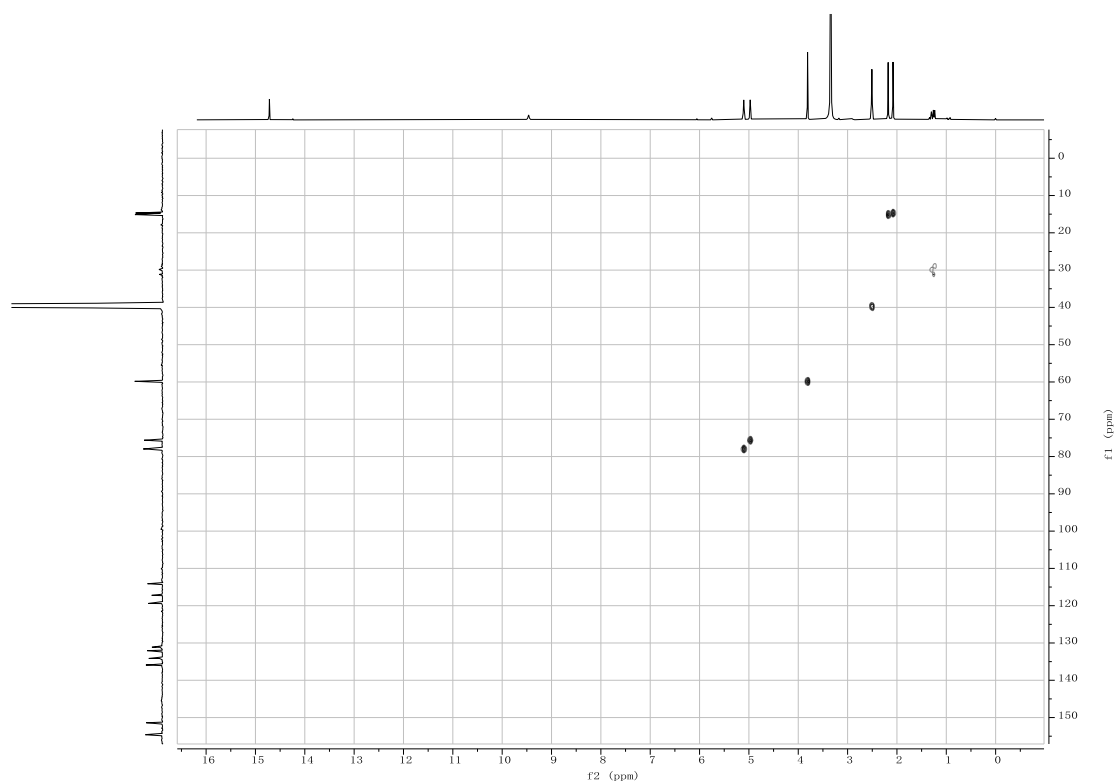

**Fig.S5.** HSQC spectrum of compound **1** (DMSO- $d_6$ )

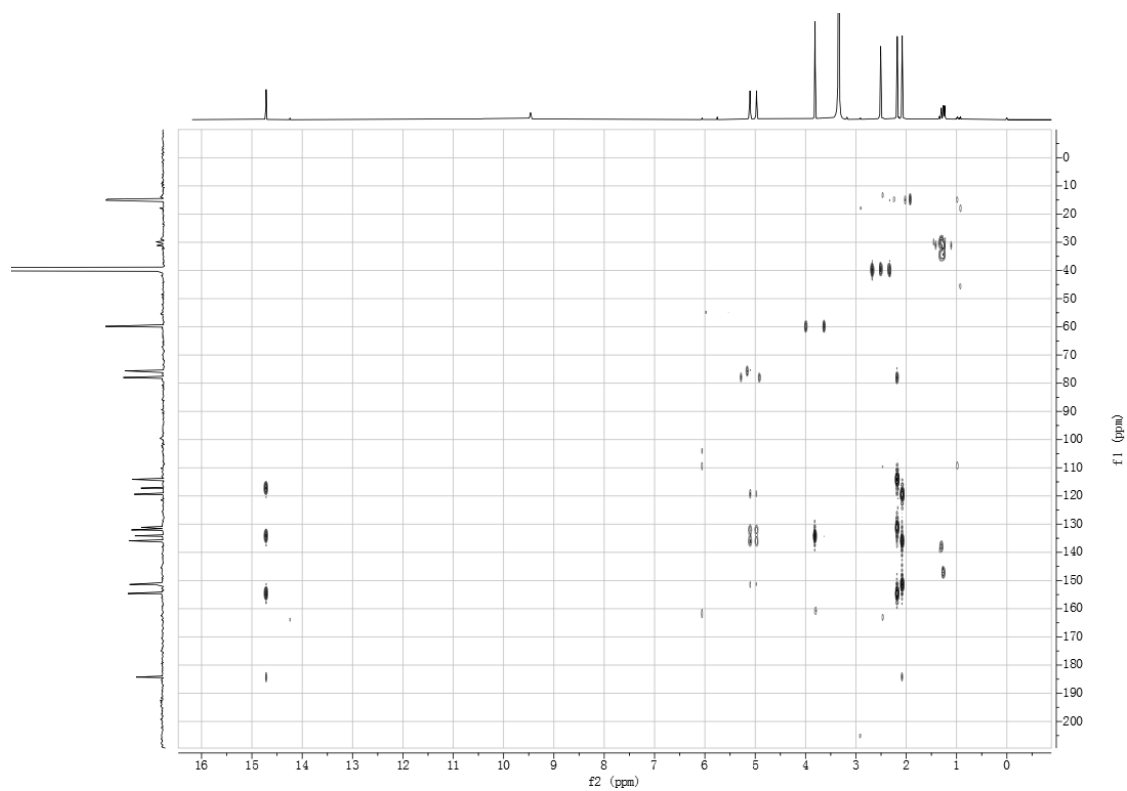

**Fig.S6.** HMBC spectrum of compound **1** (DMSO- $d_6$ )

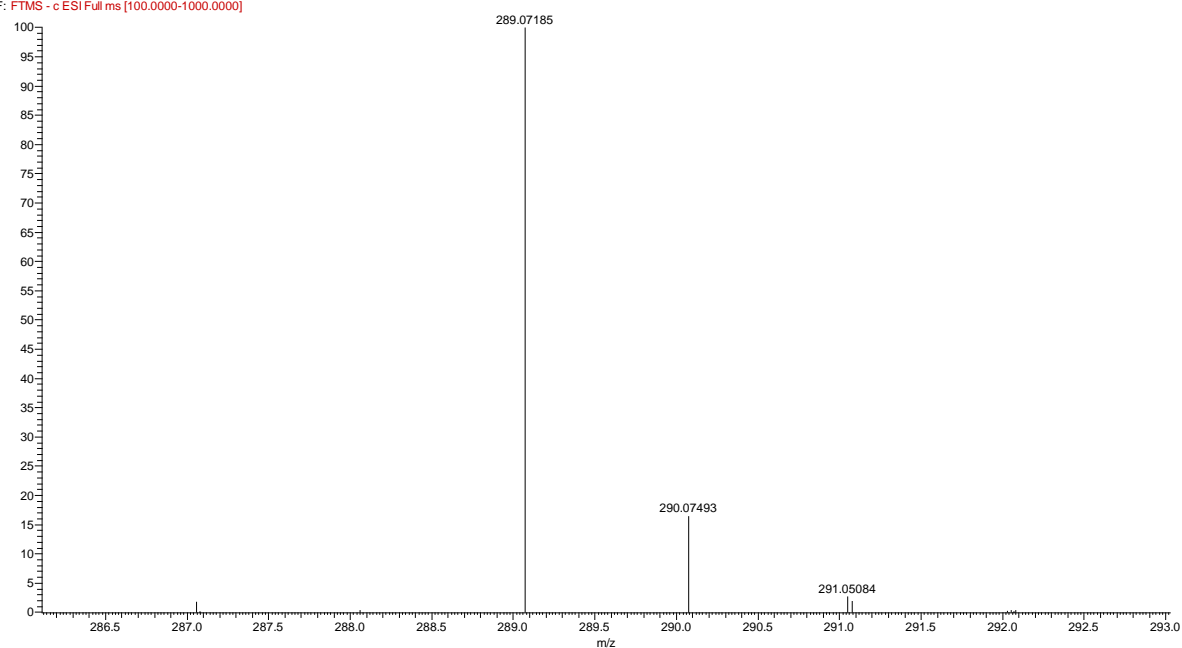

SPECTRUM - simulation :

| $m/z$     | Theo. Mass | Delta (ppm) | RDB equiv. | Composition                                    |
|-----------|------------|-------------|------------|------------------------------------------------|
| 289.07185 | 289.07176  | 0.31        | 9.5        | C <sub>15</sub> H <sub>13</sub> O <sub>6</sub> |

**Fig.S7.** HRESIMS spectrum of compound **2**

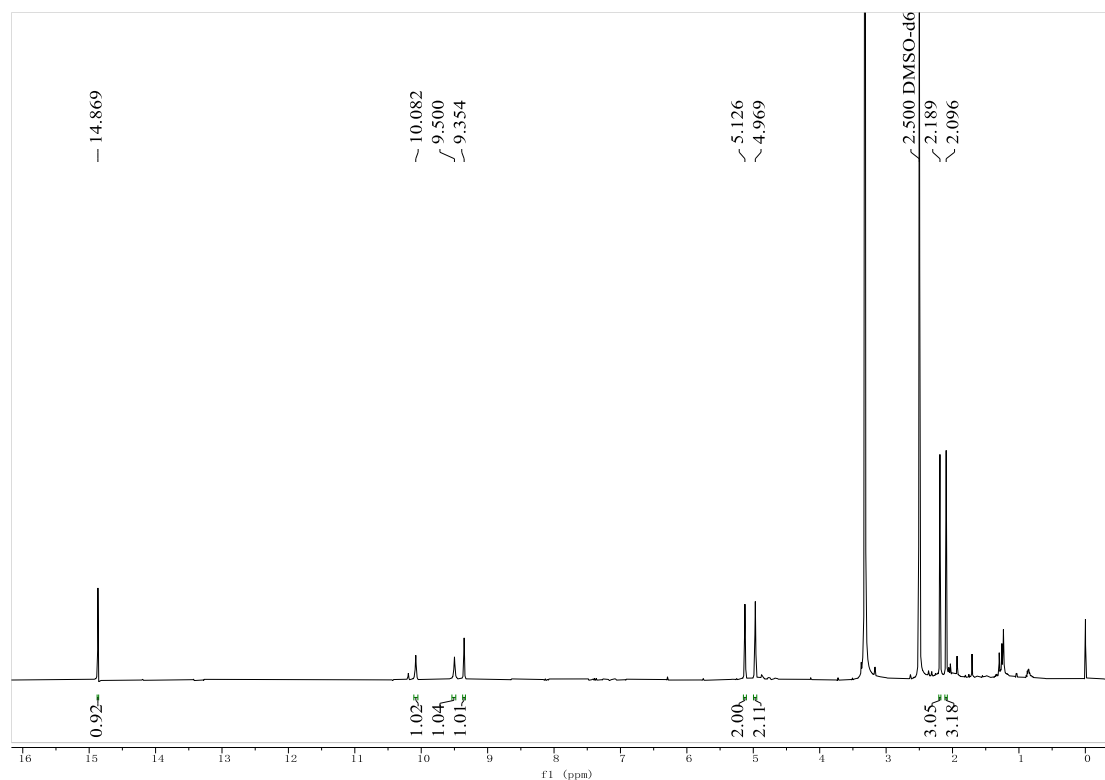

**Fig.S8.** <sup>1</sup>H NMR spectrum of compound **2** (500 MHz, DMSO-*d*<sub>6</sub>)

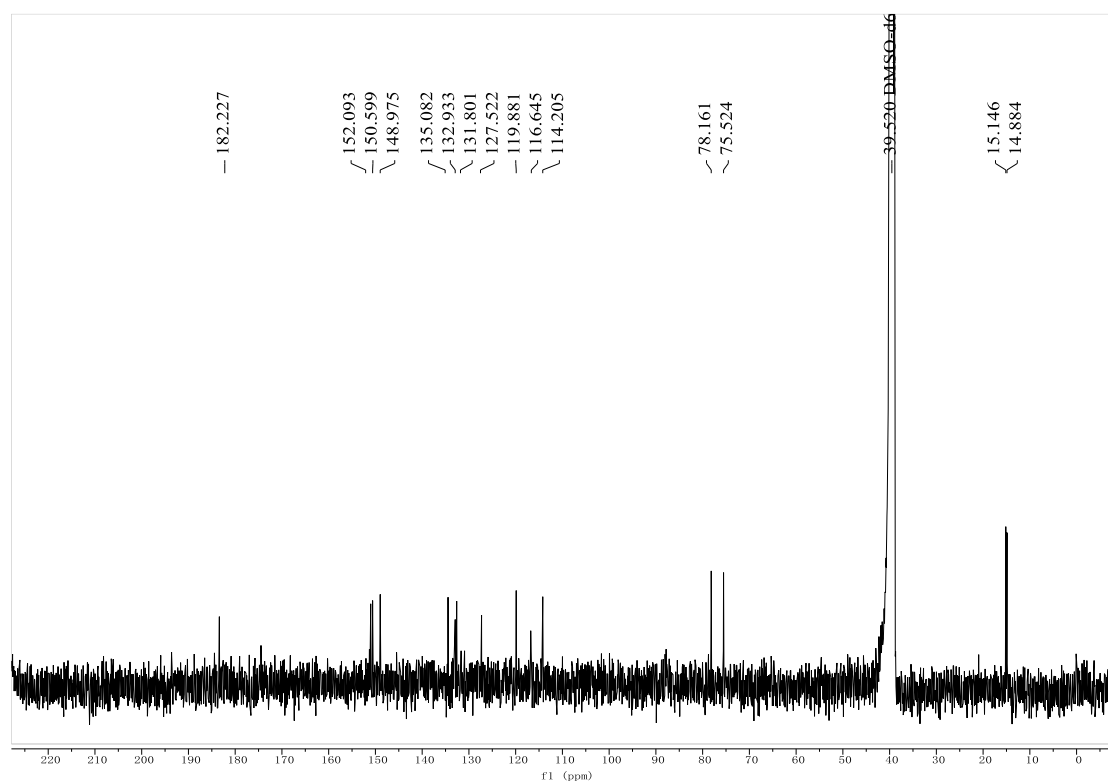

**Fig.S9.**  $^{13}\text{C}$  NMR spectrum of compound **2** (125 MHz, DMSO- $d_6$ )

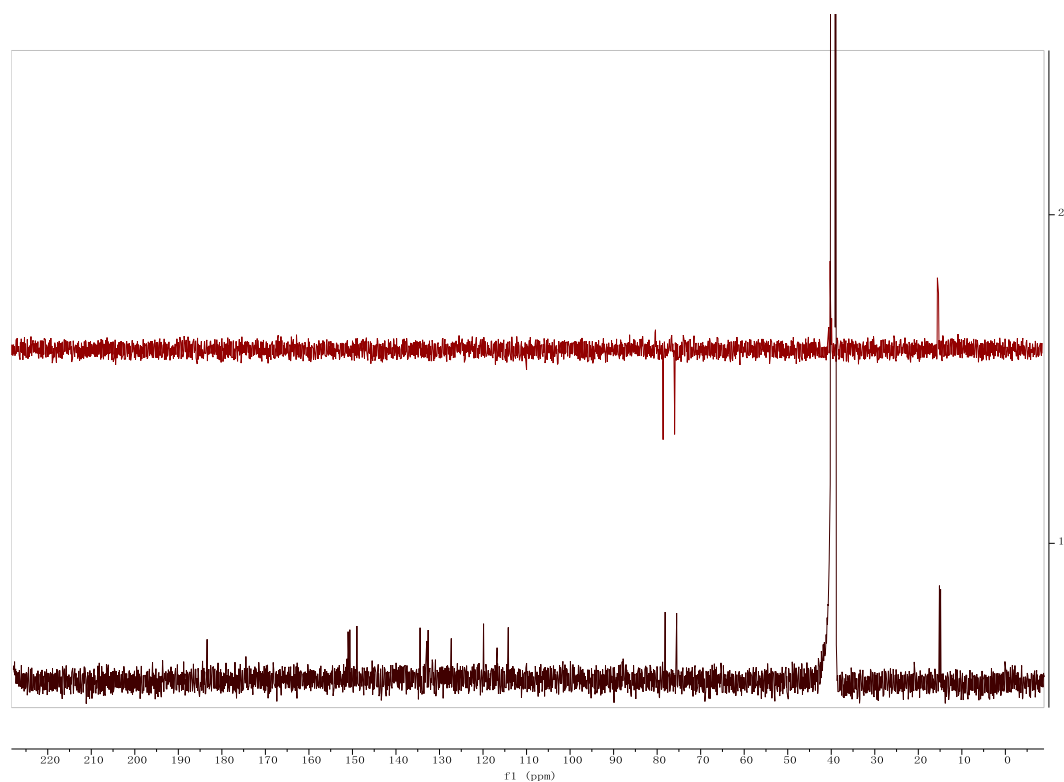

**Fig.S10.** DEPT 135 and  $^{13}\text{C}$  NMR spectra of compound **2** (125 MHz, DMSO- $d_6$ )

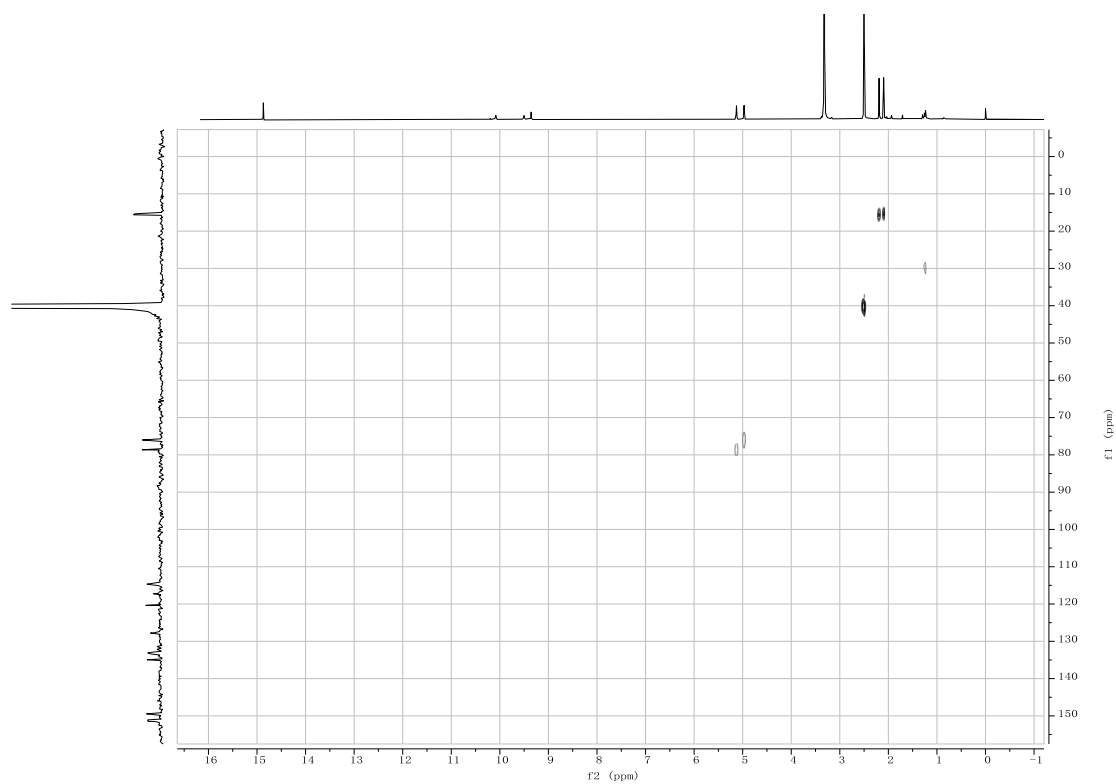

**Fig.S11.** HSQC spectrum of compound **2** (DMSO-*d*<sub>6</sub>)

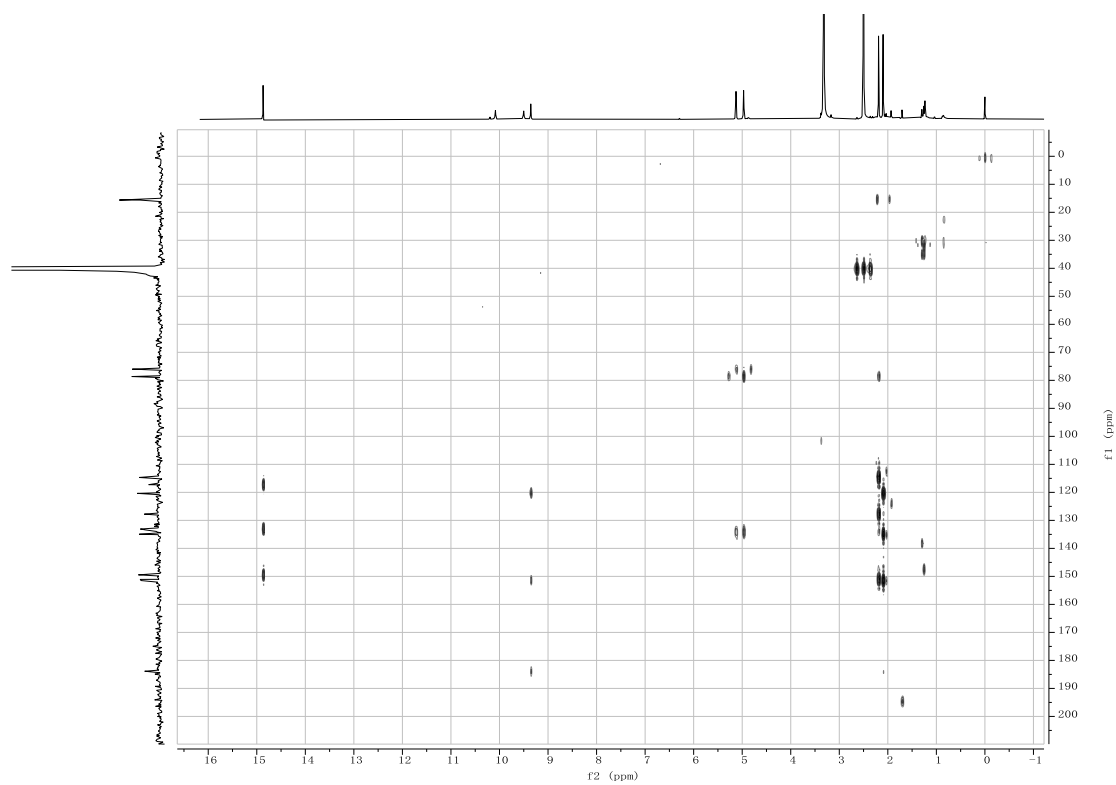

**Fig.S12.** HMBC spectrum of compound **2** (DMSO-*d*<sub>6</sub>)



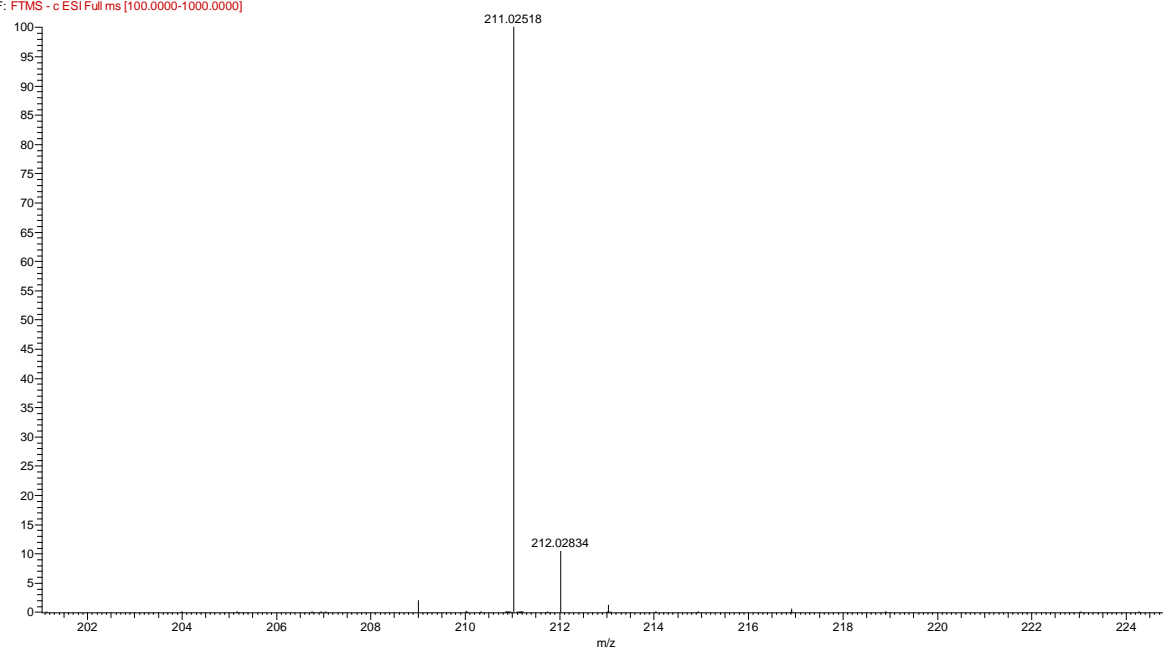

SPECTRUM - simulation :

| $m/z$     | Theo. Mass | Delta (ppm) | RDB equiv. | Composition                                  |
|-----------|------------|-------------|------------|----------------------------------------------|
| 211.02518 | 211.02481  | 1.75        | 6.5        | C <sub>9</sub> H <sub>7</sub> O <sub>6</sub> |

**Fig.S13.** HRESIMS spectrum of compound **3**

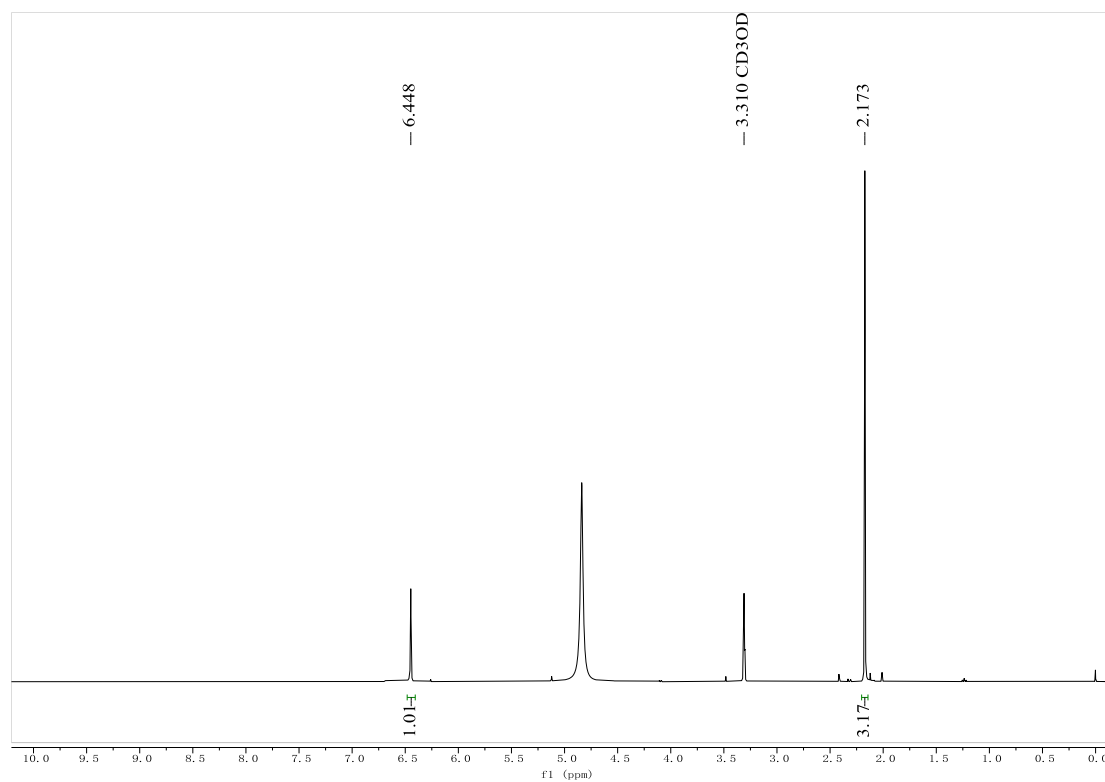

**Fig.S14.** <sup>1</sup>H NMR spectrum of compound **3** (400 MHz, MeOH-*d*<sub>4</sub>)

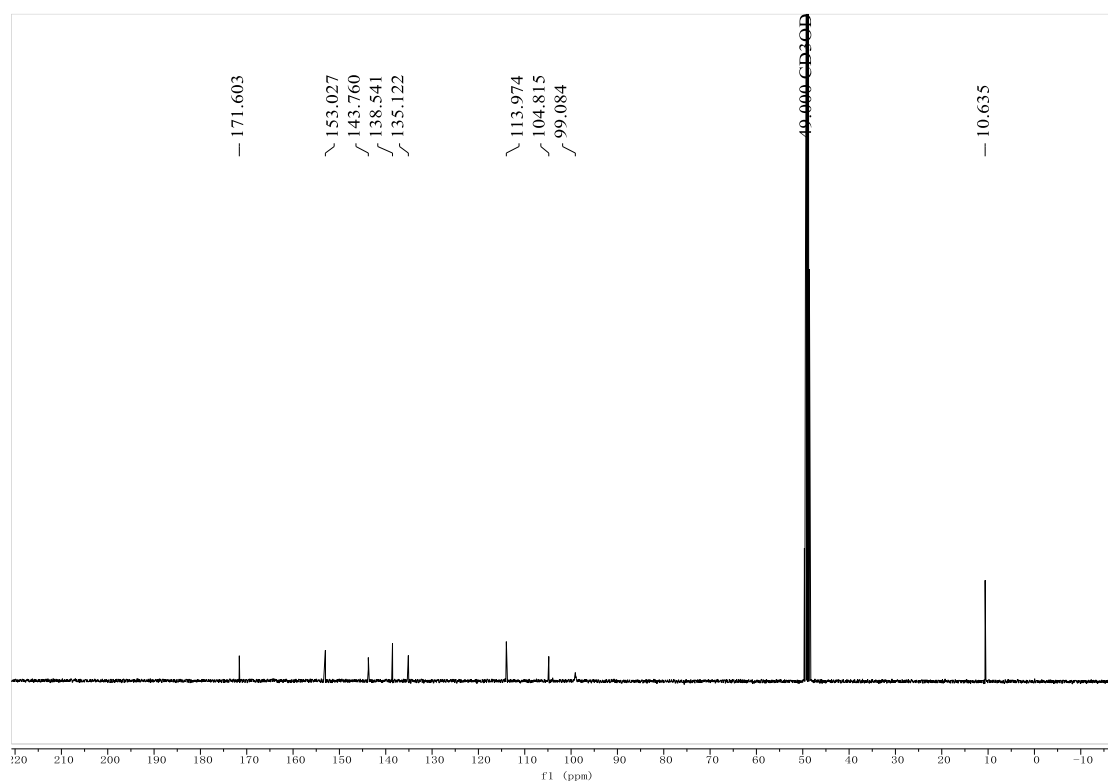

**Fig.S15.**  $^{13}\text{C}$  NMR spectrum of compound **3** (100 MHz,  $\text{MeOH-}d_4$ )

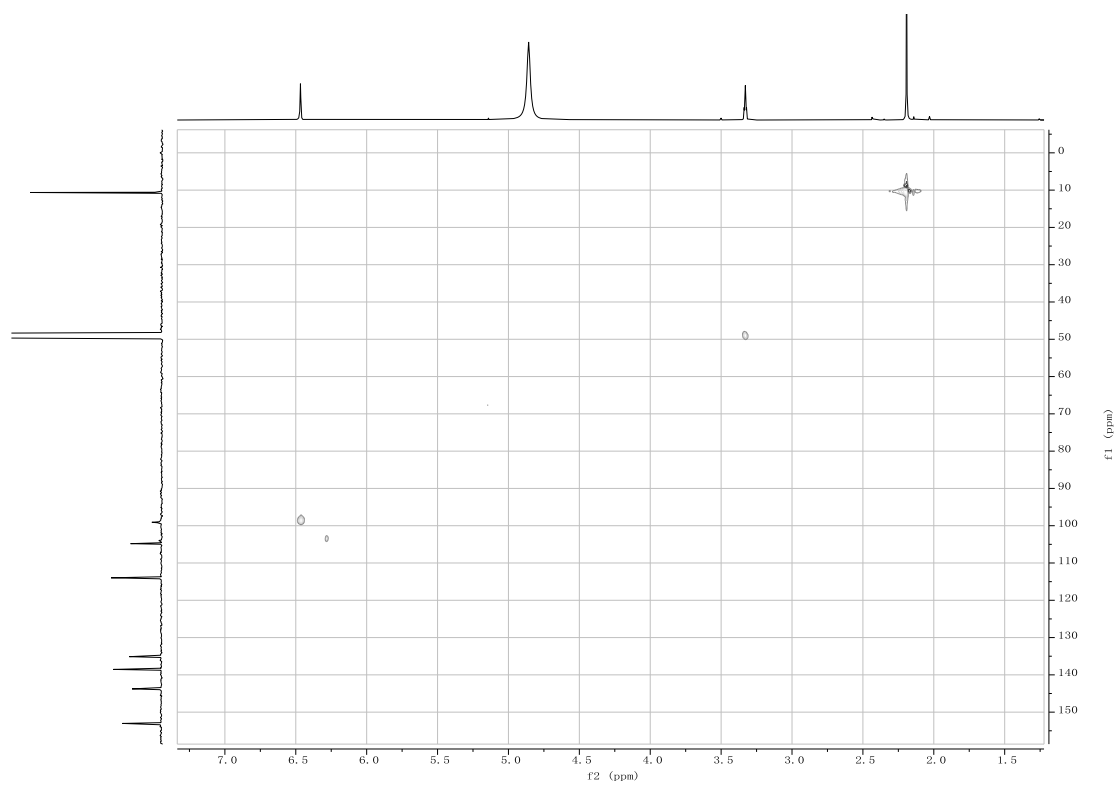

**Fig.S16.** HSQC spectrum of compound **3** ( $\text{MeOH-}d_4$ )

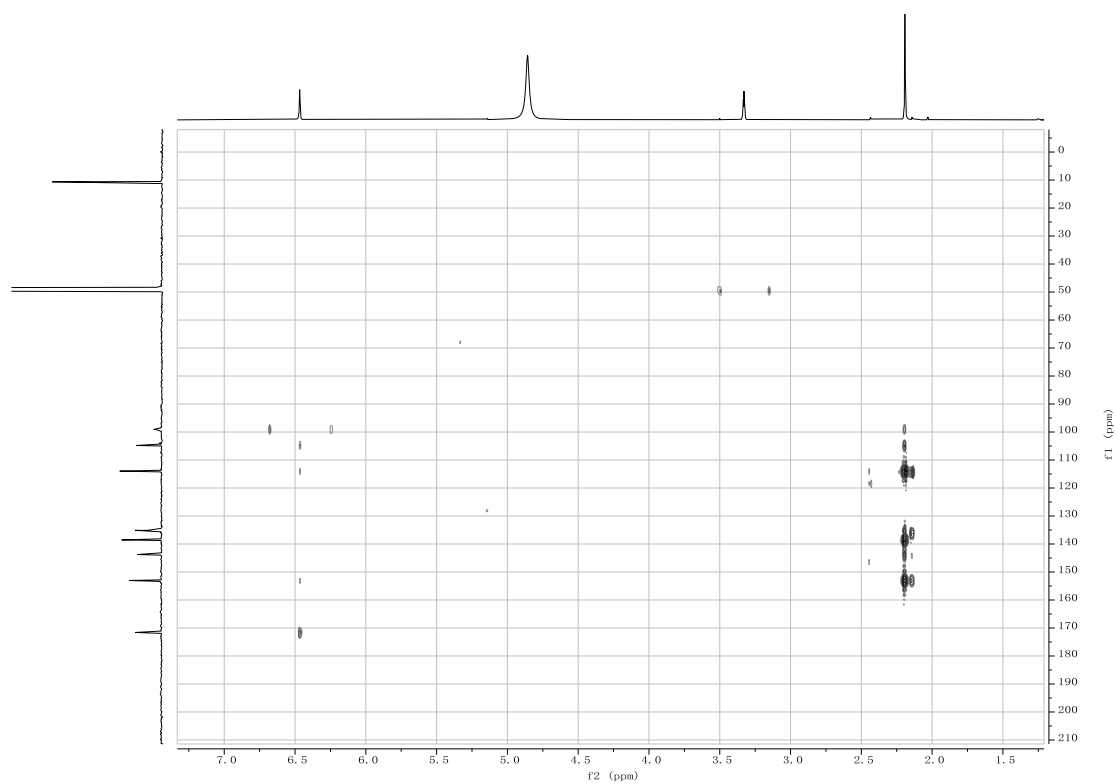

**Fig.S17.** HMBC spectrum of compound **3** (MeOH-*d*<sub>4</sub>)
